# Supplementary material for: Comparative Genomic Analysis Reveals Ecological Differentiation in the Genus Carnobacterium
Source: Front Microbiol. 2017 Mar 8;8:357. doi: 10.3389/fmicb.2017.00357 (PMC5341603; doi:10.3389/fmicb.2017.00357)
Supplement: Supplementary file 1 [file Table_1.xlsx]

## Sheet: Table S1
	Table S1 : occurence of genes encoding surface proteins of the 9 Carnobacterium strains, and the genes involved in proteolysis. Yellow cases indicate the presence of one homolog in a genome, the green cases indicate the presence of duplicated genes in the same genome.
			C. maltaromaticum					C. divergens	C. inhibens subsp. gilichinskyi	Carnobacterium sp.
Function category			LMA28	DSM20342	ATCC35586	3-18	ML-1-97	V41	WN1359	AT7	17-4
Enzyme	Cell wall (LPXTG motif) Proteinase	prtB	BN424_3077	JQMX_v1-12801	AGNSv1_370130	CM318v1_460013	BN1423_v1_1290020	CDIVv1_140219
Nutrient uptake	Oligopeptide transport system	OppA	BN424_931 BN424_1168 BN424_1169 BN424_1263 BN424_1936	JQMX_v1_10423 JQMX_v1_11013 JQMX_v1_11112 JQMX_v1_11113 JQMX_v1_11403 JQMX_v1_11856 JQMX_v1_12043	AGNSv1_230077 AGNSv1_310016 AGNSv1_310017 AGNSv1_390072 AGNSv1_480018 AGNSv1_520062 AGNSv1_200038	CM318v1_50005 CM318v1_50006 CM318v1_210036 CM318v1_220040 CM318v1_440127 CM318v1_560063 CM318v1_1500018	BN1423_v1_730035 BN1423_v1_740006 BN1423_v1_740007 BN1423_v1_950019 BN1423_v1_1320013	CDIVv1_320648 CDIVv1_320649 CDIVv1_120089 CDIVv1_50025 CDIVv1_40028 CDIVv1_20057	Q783_03285 Q783_03290 Q783_07975	ABHHv1_110071 ABHHv1_110072 ABHHv1_010131	CAR_c07390 CAR_c07400 CAR_c17340
		OppB	BN424_2393	JQMX_v1_13500	AGNSv1_220058	CM318v1_430043	BN1423_v1_210001	CDIVv1_320639	Q783_03325	ABHHv1_110064	CAR_c07470
		OppC	BN424_2392	JQMX_v1_13501	AGNSv1_220059	CM318v1_430044	BN1423_v1_210002	CDIVv1_320638	Q783_03330	ABHHv1_110063	CAR_c07480
		OppD	BN424_2391	JQMX_v1_13502	AGNSv1_220060	CM318v1_430045	BN1423_v1_210003	CDIVv1_320637	Q783_03335	ABHHv1_110062	CAR_c07490
		OppF	BN424_2390	JQMX_v1_13503	AGNSv1_220061	CM318v1_430046	BN1423_v1_210004	CDIVv1_320636	Q783_03340	ABHHv1_110061	CAR_c07500
		DtpT	BN424_1736	JQMX_v1_10552	AGNSv1_500044	CM318v1_210217	BN1423_v1_180008	CDIVv1_320386
Enzyme	Tripeptidase	PepT	BN424_1746 BN424_1935	JQMX_v1_10424 JQMX_v1_10543	AGNSv1_500035 AGNSv1_390073	CM318v1_210208 CM318v1_210037	BN1423_v1_1540007 BN1423_v1_1250021	CDIVv1_320392	Q783_05365 Q783_09335	ABHHv1_90071 ABHHv1_100008	CAR_c11730 CAR_c20370
Enzyme	Dipeptidase	PepV	BN424_1096		AGNSv1_550032	CM318v1_590029	BN1423_v1_2190004	CDIVv1_40254	Q783_02400	ABHHv1_250032	CAR_c05690
Enzyme	Endopeptidase	PepF	BN424_2445 BN424_2215	JQMX_v1_10206	AGNSv1_220008 AGNSv1_610001	CM318v1_630028 CM318v1_170009	BN1423_v1_1970002 BN1423_v1_360007	CDIVv1_320632 CDIVv1_40179	Q783_03360 Q783_02810 Q783_09330	ABHHv1_110057 ABHHv1_70101 ABHHv1_100007	CAR_c07540 CAR_c06450 CAR_c20360
Enzyme	Prolidase	PepQ	BN424_2226	JQMX_v1_10196	AGNSv1_590002	CM318v1_160014	BN1423_v1_1840002 BN1423_v1_1840001	CDIVv1_40192	Q783_02750	ABHHv1_470003	CAR_c06350
Enzyme	Proline peptidase	PepP/PepQ	BN424_2304	JQMX_v1_10117	AGNSv1_2200092	CM318v1_430077	BN1423_v1_1530028		Q783_10240	ABHHv1_60006
Enzyme	Pyrrolidone carboxylate peptidase	PCP	BN424_3450	JQMX_v1_12456	AGNSv1_320128	CM318v1_1470042	BN1423_v1_890019	CDIVv1_270082			CAR_c14840
Enzyme	Aminopeptidase	PepA	BN424_1132		AGNSv1_460012	CM318v1_60012	BN1423_v1_1170012	CDIVv1_320680	Q783_03205	ABHHv1_140014	CAR_c07230
Enzyme		PepS	BN424_2586	JQMX_v1_13289	AGNSv1_230273	CM318v1_580017	BN1423_v1_450006	CDIVv1_230162	Q783_07180	ABHHv1_300004	CAR_c15790
Enzyme		PepC							Q783_08765	ABHHv1_20055	CAR_c19130
Enzyme	Sortase	srtA	BN424_577	JQMX_v1_11737	AGNSv1_640058	CM318v1_500010	BN1423_v1_50010	CDIVv1_270320		ABHHv1_120050	CAR_c15170
			BN424_1760	JQMX_v1_10530	AGNSv1_500022	CM318v1_210195	BN1423_v1_1060017	CDIVv1_320409
			BN424_2317	JQMX_v1_10008 JQMX_v1_10101	AGNSv1_640058 AGNSv1_260136	CM318v1_500010 CM318v1_520044	BN1423_v1_50010 BN1423_v1_490025	CDIVv1_270320
			BN424_2789	JQMX_v1_13088	AGNSv1_260136	CM318v1_520044	BN1423_v1_490025	CDIVv1_140233
				JQMX_v1_40069
Enzyme		srtB	BN424_3051	JQMX_v1_12830	AGNSv1_690008	CM318v1_200004	BN1423_v1_710010	CDIVv1_320484
Enzyme		srtB	BN424_3144	JQMX_v1_12728
Enzyme		sortase (pseudogene)							Q783_09540
Enzyme	LPXTG	PrtB	BN424_3077	JQMX_v1_12801	AGNSv1_370130	CM318V1_460013	BN1423_v1_1290020	CDIVv1-140219
			BN424_3226	JQMX_v1_12648	AGNSv1_450052	CM318V1_1570046	BN1423_v1_290004	CDIVv1_140229
		LPxTG+WxL	BN424_2474	JQMX_v1_13426	AGNSv1_300004	CM318V1_630004	BN1423_v1_700003	CDIVv1_140241 (fragment)
			BN424_310	JQMX_v1_11988	AGNSv1_740031	CM318V1_570033	BN1423_v1_240001 (fragment)	CDIVv1_270272 (fragment) CDIVv1_270271 (fragment) CDIVv1_270270
Enzyme		nucleotidase	BN424_3529	JQMX_v1_12376	AGNSv1_320001 (fragment) AGNSv1_410033 (fragment)	CM318V1_670001	BN1423_v1_1450001	CDIVv1_10018
Enzyme		nucleotidase	BN424_190	JQMX_v1_12101	AGNSv1_90007	CM318V1_750003	BN1423-v1_1270006	CDIVv1_270033
			BN424_3553	JQMX_v1_12353	AGNSv1_410009	CM318V1_620001	BN1423_v1_420009	CDIVv1_140031
			BN424_3557	JQMX_v1_12350	AGNSv1_410006	CM318V1_140002	BN1423_v1_420006	CDIVv1_280039 CDIVv1_280058
			BN424_3223	JQMX_v1_12651	AGNSv1_450056	CM318V1_1570049	BN1423_v1_290007	CDIVv1_280061
Adhesion		collagen binding protein (2 parts: one with signal P and one with LPXTG motif)	BN424_147 (part1) BN424_148 (part2)	JQMX_v1_12145 (part1) JQMX_v1_12144 (part2)	AGNSv1_360180 (part1) AGNSv1_360181 (part2) AGNSv1_360182 (part3)	CM318V1_1510055	BN1423_v1_1070059	CDIVv1_270205
			BN424_1109	JQMX_v1_11170	AGNSv1_290005	CM318V1_600005	BN1423_v1_1000005
			BN424_324	JQMX_v1_11977	AGNSv1_740043	CM318V1_570044	BN1423_v1_240012
			BN424_1966	JQMX_v1_10393	AGNSv1_390045	CM318V1_210008	BN1423_v1_1340011
Adhesion		Collagen-binding surface protein Cna-like	BN424_2511	JQMX_v1_13389	AGNSv1_710004	CM318V1_340003	BN1423_v1_130003
Adhesion		LRR	BN424_3087	JQMX_v1_12787	AGNSv1_370121	CM318V1_1460060 (fragment)	BN1423_v1_1290008 (fragment)
			BN424_3173	JQMX_v1_12702	AGNSv1_370018	CM318V1_1490021	BN1423_v1_280014
Adhesion		Collagen-binding surface protein Cna, B-type domain	BN424_3195	JQMX_v1_12678	AGNSv1_450081	CM318V1_1570085	BN1423_v1_300001 (fragment) BN1423_v1_300002 (fragment)
			BN424_220	JQMX_v1_12070	AGNSv1_90019	CM318V1_90018	BN1423_v1_1280003
			BN424_201	JQMX_v1_12089	AGNSv1_90019	CM318V1_230009 CM318V1_370020	BN1423-v1_750010
Adhesion		mucBP	BN424_25	JQMX_v1_12240	AGNSv1_360081	CM318V1_1470001	BN1423_v1_920005
Adhesion		mucBP	BN424_711	JQMX_v1_11615 (fragment) JQMX_v1_11616 (fragment)	AGNSv1_400036	CM318V1_1560001	BN1423_v1_880005
			BN424_183	JQMX_v1_12108	AGNSv1_90001 (fragment) AGNSv1_360218 (fragment)	CM318V1_660001 (fragment) CM318V1_1510097 (fragment)
Enzyme		Glycoside hydrolase, superfamily	BN424_641	JQMX_v1_11684	AGNSv1_70077		BN1423_v1_1020014
			BN424_115	JQMX_v1_12180		CM318V1_1510018		CDIVv1_280025
Adhesion		Bacterial Ig-like, Collagen-binding surface protein Cna-like, B-type domain	BN424_123	JQMX_v1_12172		CM318V1_1510026		CDIVv1_280015
			BN424_159	JQMX_v1_12132	AGNSv1_360194
Adhesion		pilB	BN424_3145	JQMX_v1_12727
Adhesion		spaD	BN424_3146	JQMX_v1_12726
Adhesion		spaC	BN424_3147	JQMX_v1_12725
			BN424_1627	JQMX_v1_10652
Adhesion		mucBP	BN424_2985	JQMX_v1_12898
Adhesion		Collagen-binding surface protein Cna-like, B-type domain			AGNSv1_230132 (fragment) AGNSv1_230133 (fragment)			CDIVv1_320181
Adhesion		Bacterial adhesins			AGNSv1_410029	CM318V1_620020
						CM318V1_1570066	BN1423_v1_290027
			BN424_2364
			BN424_2984
Adhesion		Collagen-binding surface protein Cna-like, B-type domain		JQMX_v1_10050
Adhesion		Collagen-binding Cna B-type domain		JQMX_v1_50122
							BN1423_v1_790008
								CDIVv1_10071
								CDIVv1_140202
								CDIVv1_120082
								CDIVv1_120102
		LPxTG+WxL						CDIVv1_140029
								CDIVv1_140064
								CDIVv1_140240
Adhesion		Adhesin						CDIVv1_270167
								CDIVv1_270186
								CDIVv1_50151
Adhesion		Collagen-binding Cna B-type, Adhesin									ABHHv1_120049
	WxL		BN424_116	JQMX_v1_12179	AGNSv1_90019	CM318V1_1510019	BN1423_v1_290028	CDIVv1_280026
			BN424_117	JQMX_v1_12178	AGNSv1_90020	CM318V1_1510020	BN1423_v1_1280004	CDIVv1_280027
			BN424_118	JQMX_v1_12177	AGNSv1_90021	CM318V1_1510021	BN1423_v1_290030	CDIVv1_280028
		LPxTG+WxL	BN424_201	JQMX_v1_12089	AGNSv1_340018	CM318V1_230009	BN1423_v1_870010	CDIVv1_280026
			BN424_202	JQMX_v1_12088	AGNSv1_340019	CM318V1_230010	BN1423_v1_750011	CDIVv1_280027
			BN424_203	JQMX_v1_12087	AGNSv1_340020	CM318V1_230011	BN1423_v1_870012	CDIVv1_280028
			BN424_308	JQMX_v1_11990	AGNSv1_740028	CM318V1_570031	BN1423_v1_220030	CDIVv1_140281
		LPxTG+WxL	BN424_324	JQMX_v1_11976	AGNSv1_740044	CM318V1_570045	BN1423_v1_240013	CDIVv1_10072
			BN424_325	JQMX_v1_11975 JQMX_v1_11974	AGNSv1_740045 AGNSv1_740046	CM318V1_570046 CM318V1_570047	BN1423_v1_240014 BN1423_v1_240015	CDIVv1_10072 CDIVv1_10073
			BN424_326	JQMX_v1_11973	AGNSv1_740047	CM318V1_570048	BN1423_v1_240016	CDIVv1_10074
			BN424_327	JQMX_v1_11972	AGNSv1_740048	CM318V1_570049	BN1423_v1_240017	CDIVv1_10075
			BN424_328	JQMX_v1_11971	AGNSv1_740049	CM318V1_570050	BN1423_v1_240018	CDIVv1_10076
			BN424_329	JQMX_v1_11970	AGNSv1_740050	CM318V1_570051	BN1423_v1_240019	CDIVv1_10077
			BN424_2469	JQMX_v1_13431	AGNSv1_300009	CM318V1_630009	BN1423_v1_700008	CDIVv1_140245
			BN424_2471	JQMX_v1_13429	AGNSv1_300007	CM318V1_630007	BN1423_v1_700006	CDIVv1_140244
			BN424_2472	JQMX_v1_13428	AGNSv1_300006	CM318V1_630006	BN1423_v1_700005	CDIVv1_140243
			BN424_2473	JQMX_v1_13427	AGNSv1_300005	CM318V1_630005	BN1423_v1_700004	CDIVv1_140242
			BN424_2474	JQMX_v1_13426	AGNSv1_300004	CM318V1_630004	BN1423_v1_700003	CDIVv1_140241
			BN424_2791	JQMX_v1_13086		CM318V1_520042	BN1423_v1_490023	CDIVv1_140231
			BN424_2792	JQMX_v1_13085	AGNSv1_260134	CM318V1_520041	BN1423_v1_490022	CDIVv1_140230
			BN424_2938	JQMX_v1_12942	AGNSv1_260015	CM318V1_1540011	BN1423_v1_350003	CDIVv1_280060
			BN424_2939	JQMX_v1_12941	AGNSv1_260014	CM318V1_1540010	BN1423_v1_350002	CDIVv1_280059
			BN424_3224	JQMX_v1_12650	AGNSv1_450054	CM318V1_1570048	BN1423_v1_290006	CDIVv1_270188
			BN424_3225	JQMX_v1_12649	AGNSv1_450053	CM318V1_1570047	BN1423_v1_290005	CDIVv1_270187
			BN424_3554	JQMX_v1_12352	AGNSv1_410008	CM318V1_140004	BN1423_v1_420008	CDIVv1_280041 CDIVv1_140030
			BN424_3555	JQMX_v1_12351	AGNSv1_410007	CM318V1_140003	BN1423_v1_420007	CDIVv1_280040 CDIVv1_140029
			BN424_3580	JQMX_v1_12324	AGNSv1_340020	CM318V1_240086	BN1423_v1_870012	CDIVv1_280028
			BN424_3581	JQMX_v1_12323	AGNSv1_340019	CM318V1_240085	BN1423_v1_870011	CDIVv1_280027
			BN424_3582	JQMX_v1_12322	AGNSv1_340018	CM318V1_240084	BN1423_v1_870010	CDIVv1_280026
			BN424_3084	JQMX_v1_12790	AGNSv1_370123	CM318V1_460003 CM318V1_460002	BN1423_v1_1290011
			BN424_3085	JQMX_v1_12789	AGNSv1_370123	CM318V1_460004 CM318V1_460002	BN1423_v1_1290011
			BN424_264	JQMX_v1_12033	AGNSv1_480029	CM318V1_1500028	BN1423_v1_950030
			BN424_120	JQMX_v1_12175		CM318V1_1510023		CDIVv1_280030
			BN424_122	JQMX_v1_12173		CM318V1_1510025		CDIVv1_280032
		LPxTG+WxL	BN424_220	JQMX_v1_12070		CM318V1_90018
			BN424_221	JQMX_v1_12069		CM318V1_90019
			BN424_222	JQMX_v1_12068		CM318V1_90020
			BN424_223	JQMX_v1_12067		CM318V1_90021
			BN424_1624	JQMX_v1_10655
			BN424_1625	JQMX_v1_10654
			BN424_1626	JQMX_v1_10653
			BN424_1800	JQMX_v1_10489	AGNSv1_370123		BN1423_v1_1290011
			BN424_2961	JQMX_v1_12919	AGNSv1_360094
			BN424_2963	JQMX_v1_12917	AGNSv1_360092
		LRR_5, carbohydrate binding proteins (Lectin-L-type superfamily), Bacterial Ig-like (Bid-2)	BN424_3039	JQMX_v1_12842		CM318V1_200014	BN1423_v1_760003
Adhesion		LRR_5, Bacterial Ig-like (Bid-2)	BN424_3043	JQMX_v1_12838
Adhesion			BN424_3045	JQMX_v1_12836		CM318V1_200009	BN1423_v1_1400001
			BN424_3049	JQMX_v1_12832		CM318V1_200006	BN1423_v1_710012
						CM318V1_1570068	BN1423_v1_290029
						CM318V1_1570071	BN1423_v1_290032
						CM318V1_1570072	BN1423_v1_290033
			BN424_1621
				JQMX_v1_12190
					AGNSv1_370063
					AGNSv1_370059
					AGNSv1_370057
					AGNSv1_190016
					AGNSv1_190017
						CM318V1_360001
						CM318V1_370020
						CM318V1_370021
						CM318V1_370022
						CM318V1_370024
						CM318V1_1570067
						CM318V1_1570069
							BN1423_v1_790009
							BN1423_v1_790011
		LPxTG+WxL					BN1423_v1_1280003
							BN1423_v1_2160001
								CDIVv1_10079
								CDIVv1_50148
								CDIVv1_50150
								CDIVv1_140065
								CDIVv1_140066
								CDIVv1_140226
								CDIVv1_140265
								CDIVv1_140280
								CDIVv1_270257
								CDIVv1_270258
								CDIVv1_270259
								CDIVv1_270260
								CDIVv1_270261
								CDIVv1_270262
								CDIVv1_270263
			BN424_800	JQMX_v1_11522	AGNSv1_620033	CM318V1_440002	BN1423_v1_1440002	CDIVv1_140075	Q783_07720	ABHHv1_10084	CAR_c16890
	LysM	Glucosaminidase, Lysozyme subfamily LytF	BN424_1067	JQMX_v1_11209	AGNSv1_180007	CM318V1_40001 (fragment)	BN1423_v1_2240001 (fragment)	CDIVv1_290015 (fragment) CDIVv1_290016 (fragment)	Q783_02360	ABHHv1_370007	CAR_c05630
Enzyme			BN424_292	JQMX_v1_12003	AGNSv1_740014	CM318V1_570017	BN1423_v1_220016	CDIVv1_320266
			BN424_333	JQMX_v1_11966	AGNSv1_740055	CM318V1_570055	BN1423_v1_240024	CDIVv1_50135
		Glucosaminidase	BN424_1749	JQMX_v1_10540	AGNSv1_500032	CM318V1_210205	BN1423_v1_1540004	CDIVv1_320396
Enzyme			BN424_3392
								CDIVv1_50081
		autolysin + SH3							Q783_07065	ABHHv1_130044	CAR_c15550
Enzyme		peptidase							Q783_11350	ABHHv1_380002	CAR_c25080
Enzyme		Polysaccharide deacetylase								ABHHv1_210037	CAR_c10900
Enzyme
